# Supplementary material for: Cxcr1 mediates recruitment of neutrophils and supports proliferation of tumor-initiating astrocytes in vivo
Source: PubMed Central journal article supplement (PMC6125480; doi:10.1038/s41598-018-31675-0), 2018-09-05
Supplement: 41598_2018_31675_MOESM1_ESM.pdf [file 41598_2018_31675_MOESM1_ESM.pdf]

Title: Cxcr1 mediates recruitment of neutrophils and supports proliferation of tumor-initiating astrocytes *in vivo*

Authors: Davalyn Powell<sup>1</sup>, Meng Lou<sup>1</sup>, Francisco Barros Becker<sup>1</sup>, and Anna Huttenlocher<sup>1,2\*</sup>

<sup>1</sup>Department of Medical Microbiology and Immunology, <sup>2</sup>Department of Pediatrics, University of Wisconsin-Madison, Madison, WI, USA.

\*Corresponding author: huttenlocher@wisc.edu

## Supplementary Information

Includes:

Supplemental Figures 1-3

Supplemental Figure Legends

Supplemental Movie Legends

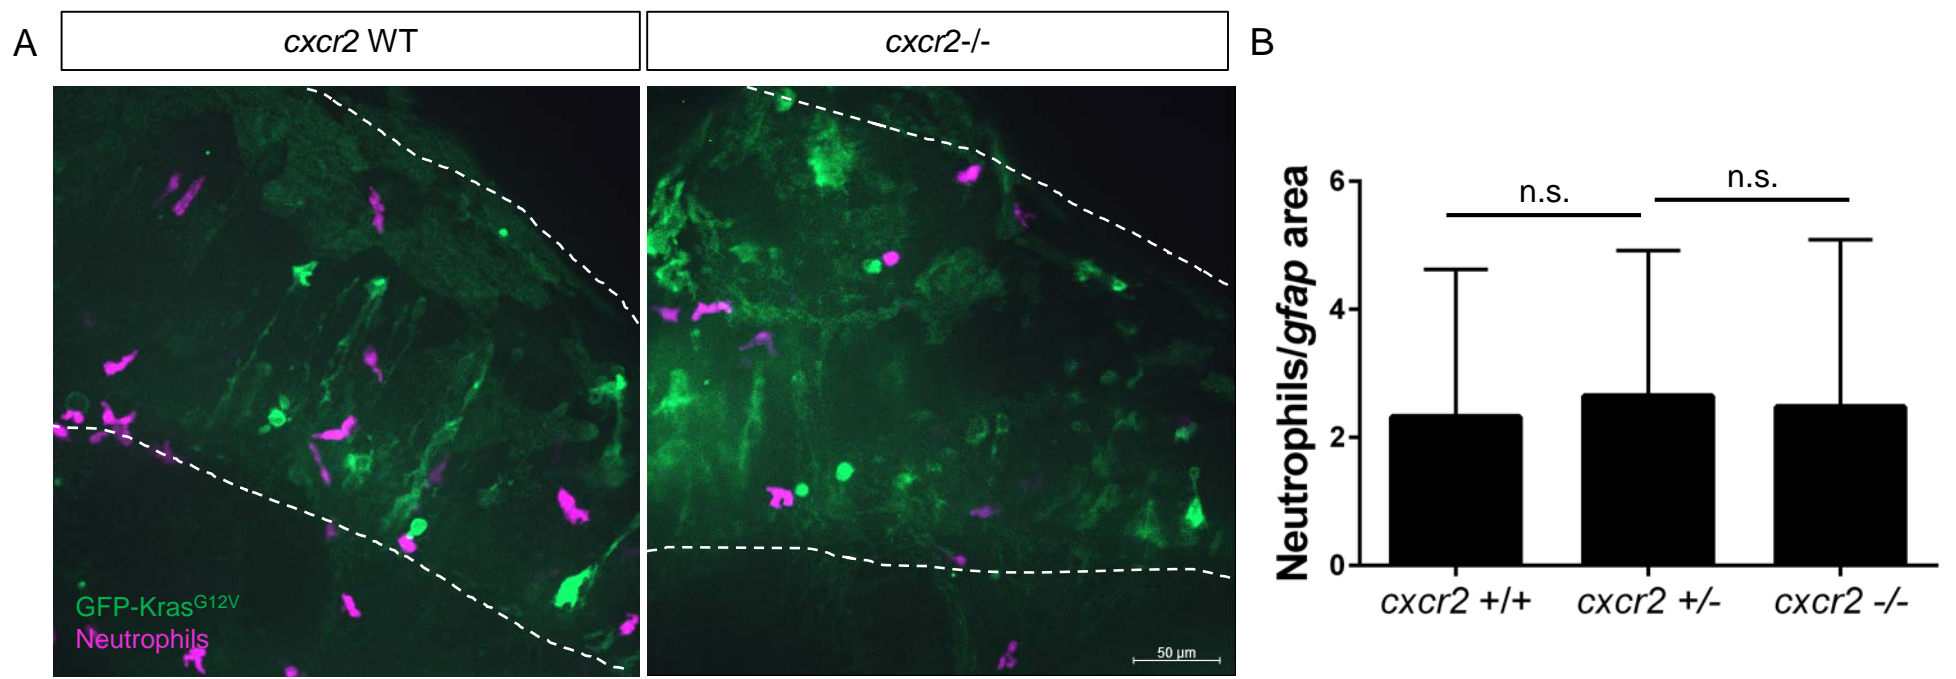

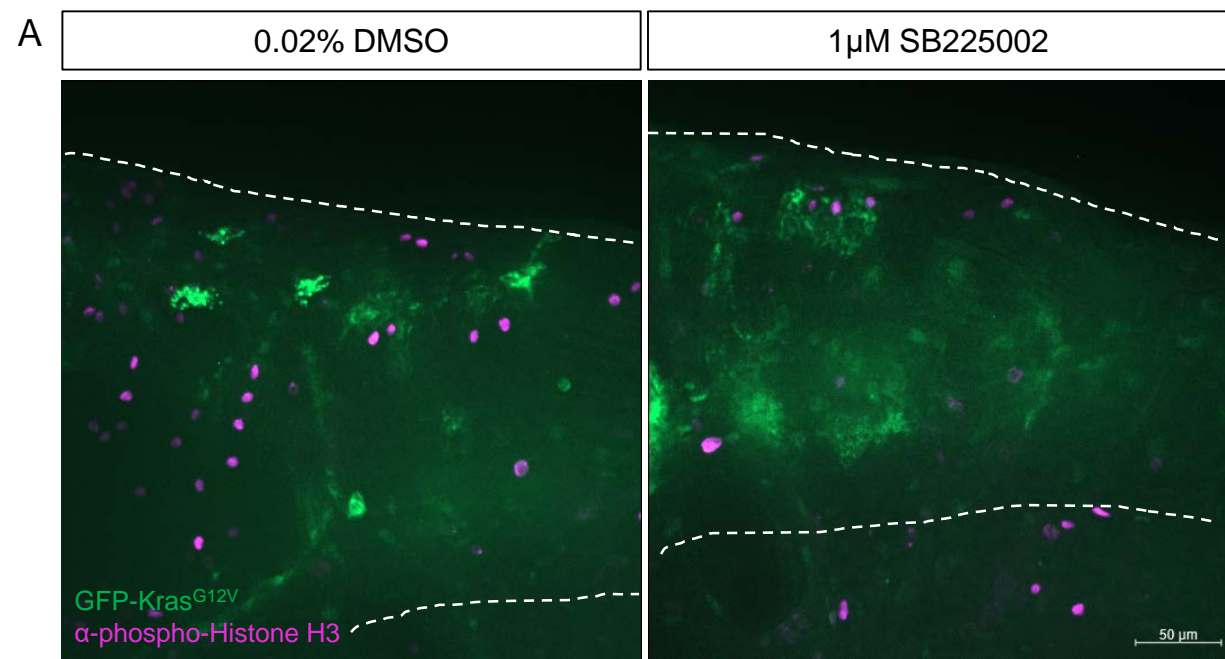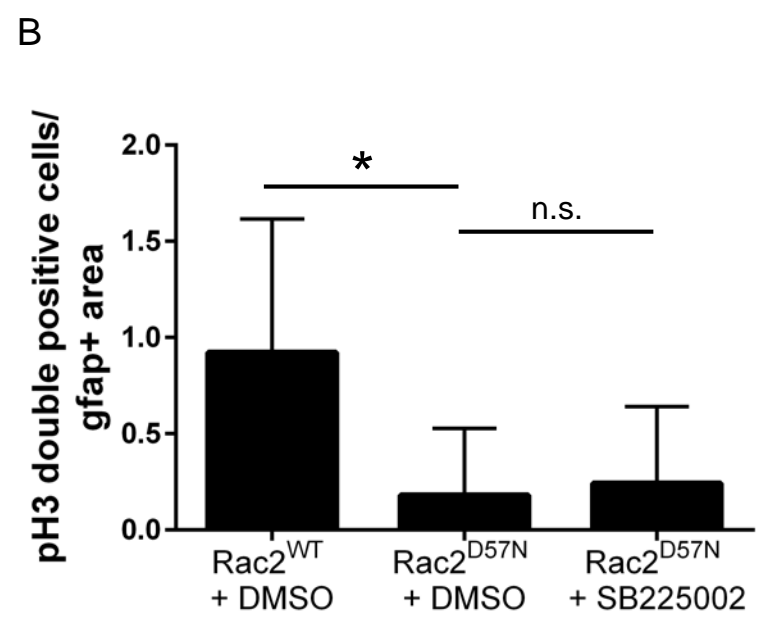

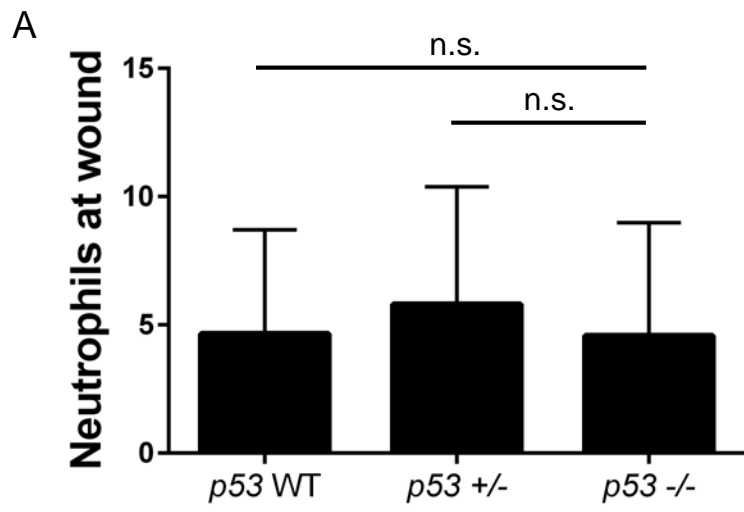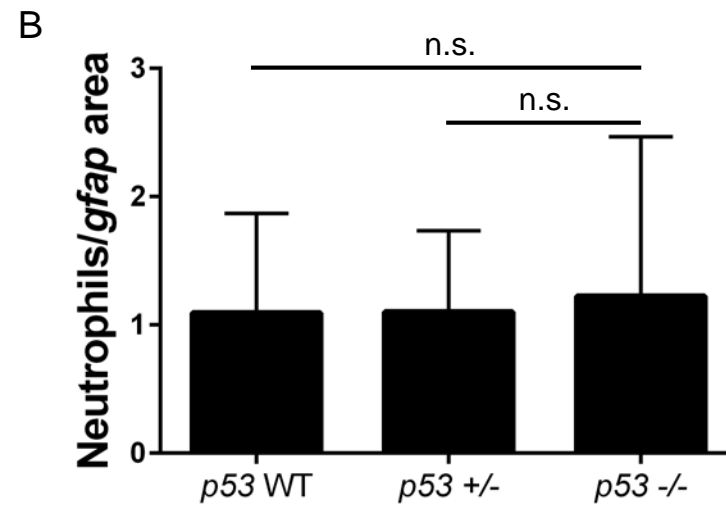

Supplemental Figure Legends:

**Supplemental Figure 1. Cxcr2 is dispensable for neutrophil recruitment to tumor-**

**initiating astrocytes.** Adult *cxcr2* heterozygote zebrafish expressing Tg(*mpx:mCherry*) were in-crossed, injected with *gfap:kras*<sup>G12V</sup>, imaged for neutrophil recruitment to the hindbrain at 3 dpf, and then processed for single-embryo genotyping (A). Neutrophils recruited to the field of view were quantified in *cxcr2* mutants and WT or heterozygote siblings (no difference observed between +/+ and +/-) and normalized to total *gfap*-expressing area (B, n= 24 WT, 23 *cxcr2*+/-, 7 *cxcr2*-/-). Data pooled from 2 replicates.

**Supplemental Figure 2. Cxcr1/2 inhibition with neutrophil-specific motility loss.**

Tg(*mpx:mCherry-2a-Rac2*<sup>WT</sup>) or Tg(*mpx:mCherry-2a-Rac2*<sup>D57N</sup>) embryos were injected with *gfap:GFP-kras*<sup>G12V</sup> and treated with 1µM SB225002 or DMSO control as described in Figure 4. Larvae were fixed at 3 dpf and immunostained for phospho-Histone H3 (A). pH3-GFP double positive cells were quantified by optical section and normalized as above (B, n= 10 *Rac2*<sup>WT</sup> + DMSO, 19 *Rac2*<sup>D57N</sup> + DMSO, 17 *Rac2*<sup>D57N</sup> + SB225002). Data pooled from 2 replicates, \*p<0.05.

**Supplemental Figure 3. Neutrophil recruitment is normal in p53 mutant**

**background.** Adult *p53* heterozygote zebrafish expressing Tg(*mpx:mCherry*) were in-crossed, exposed to a tail-transection wound at 3 dpf, then imaged 2 hours later for neutrophil recruitment to the wound edge followed by single embryo genotyping.

Neutrophils caudal to the notochord were quantified (A). *p53* heterozygote zebrafish expressing Tg(*mpx:mCherry*) were in-crossed, injected with *gfap:kras*<sup>G12V</sup>, imaged for neutrophil recruitment to the hindbrain at 3 dpf, and then processed for single-embryo

genotyping. Neutrophils recruited to the field of view were quantified and normalized to total *gfap*-expressing area (B). Data pooled from 2 replicates.

Supplemental Movie Legends:

**Supplemental Movie 1. Time-lapse imaging of neutrophil recruitment to *gfap:Kras<sup>WT</sup>* cells.** Live-imaging of neutrophils in the hindbrain of Tg(*mpx:mCherry*) larvae expressing *gfap:GFP-kras<sup>WT</sup>*. Time-lapse imaging by spinning disc confocal microscope was performed for 9 hours beginning at 3 dpf. Total neutrophils (magenta) recruited to the hindbrain during the period of imaging were quantified in Figure 2C.

**Supplemental Movie 2. Time-lapse imaging of neutrophil recruitment to *gfap:Kras<sup>G12V</sup>* cells.** Live-imaging of neutrophils in the hindbrain of Tg(*mpx:mCherry*) larvae expressing *gfap:GFP-kras<sup>G12V</sup>*. Time-lapse imaging by spinning disc confocal microscope was performed for 9 hours beginning at 3 dpf. Total neutrophils (magenta) recruited to the hindbrain during the period of imaging were quantified in Figure 2C.
